# Supplementary material for: First Report of CC5-MRSA-IV-SCCfus “Maltese Clone” in Bat Guano
Source: MDPI journal article supplement (doi:10.3390/microorganisms9112264), 2021-10-31
Supplement: s1 [file s1]

**Table S1.** Antibiotic susceptibility profile of 11 *S. aureus* strains isolated from bat guano in Aokas's cave (Bejaia, Algeria).

| <b>Antibiotics</b>        | <b>Number of isolates (%) susceptible to antibiotics</b> |
|---------------------------|----------------------------------------------------------|
| Penicillin G              | 4 (36%)                                                  |
| Cefoxitin                 | 4 (36%)                                                  |
| Erythromycin              | 0 (0%)                                                   |
| Clindamycin               | 0 (0%)                                                   |
| Quinupristin/dalfopristin | 0 (0%)                                                   |
| Kanamycin                 | 0 (0%)                                                   |
| Tobramycin                | 0 (0%)                                                   |
| Gentamicin                | 0 (0%)                                                   |
| Minocycline               | 0 (0%)                                                   |
| Ofloxacin                 | 0 (0%)                                                   |
| Fusidic acid              | 4 (36%)                                                  |
| Fosfomycin                | 0 (0%)                                                   |
| Rifampicin                | 0 (0%)                                                   |
| Cotrimoxazole             | 0 (0%)                                                   |
| Vancomycin                | 0 (0%)                                                   |
| Teicoplanin               | 0 (0%)                                                   |
